# Supplementary material for: Immunological profiles in Lynch syndrome colorectal cancers are not specific to mismatch repair gene defects
Source: bioRxiv or medRxiv preprint supplement (doi:10.1101/2024.08.27.24311855), 2024-08-28

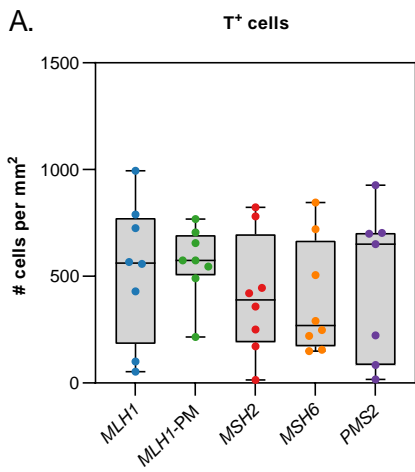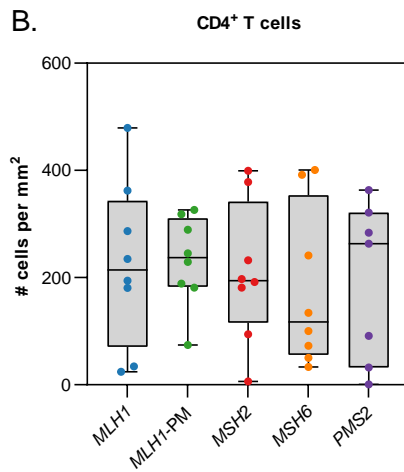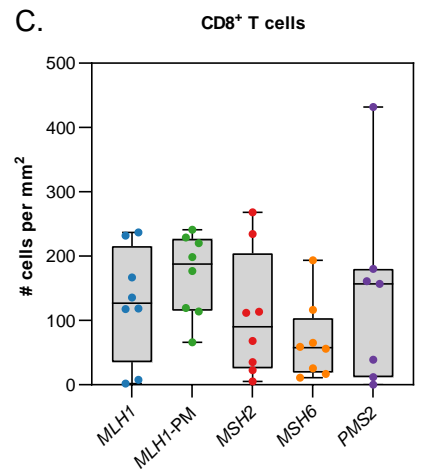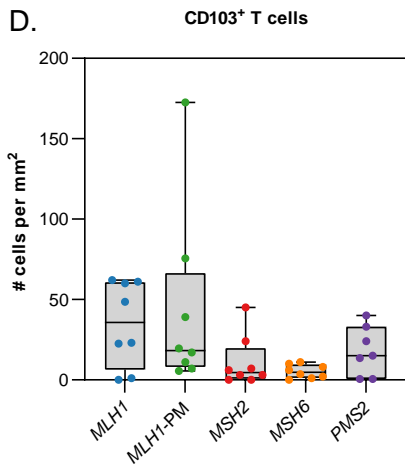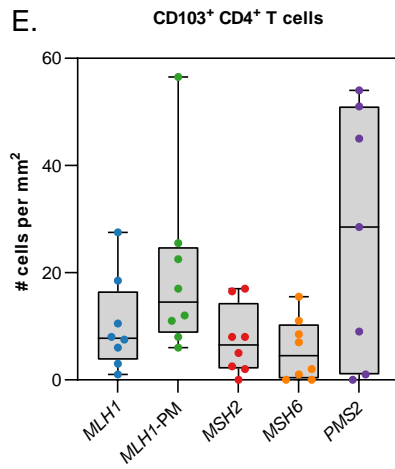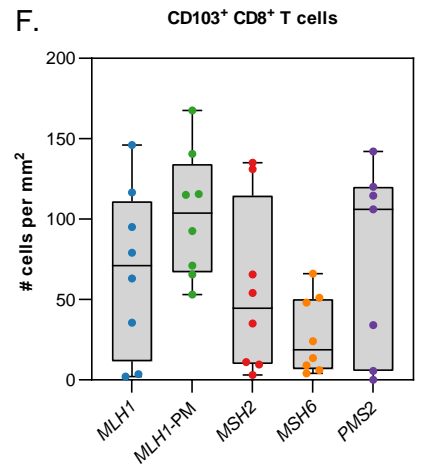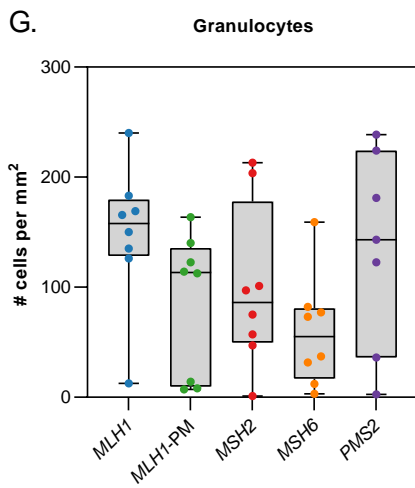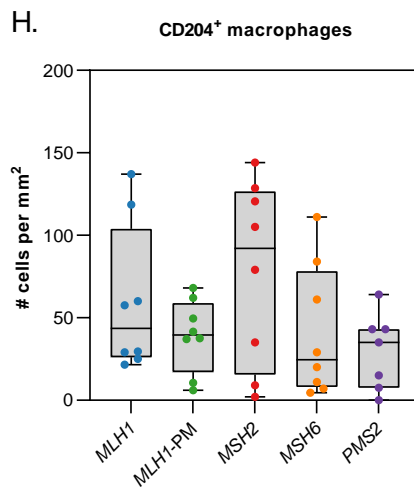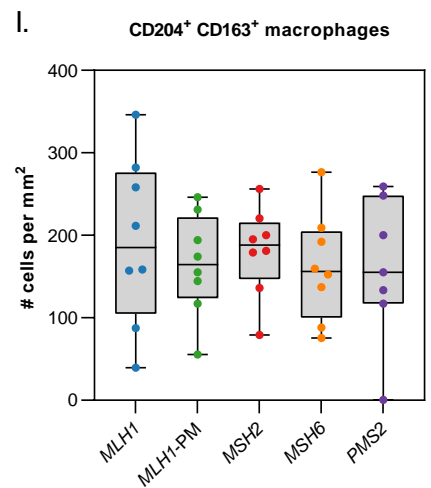

Supplement: Supplementary file [file media-2.pdf]
