# Supplementary material for: Immunological profiles in Lynch syndrome colorectal cancers are not specific to mismatch repair gene defects
Source: bioRxiv or medRxiv preprint supplement (doi:10.1101/2024.08.27.24311855), 2024-08-28
Supplement: Supplementary file [file media-5.pdf]

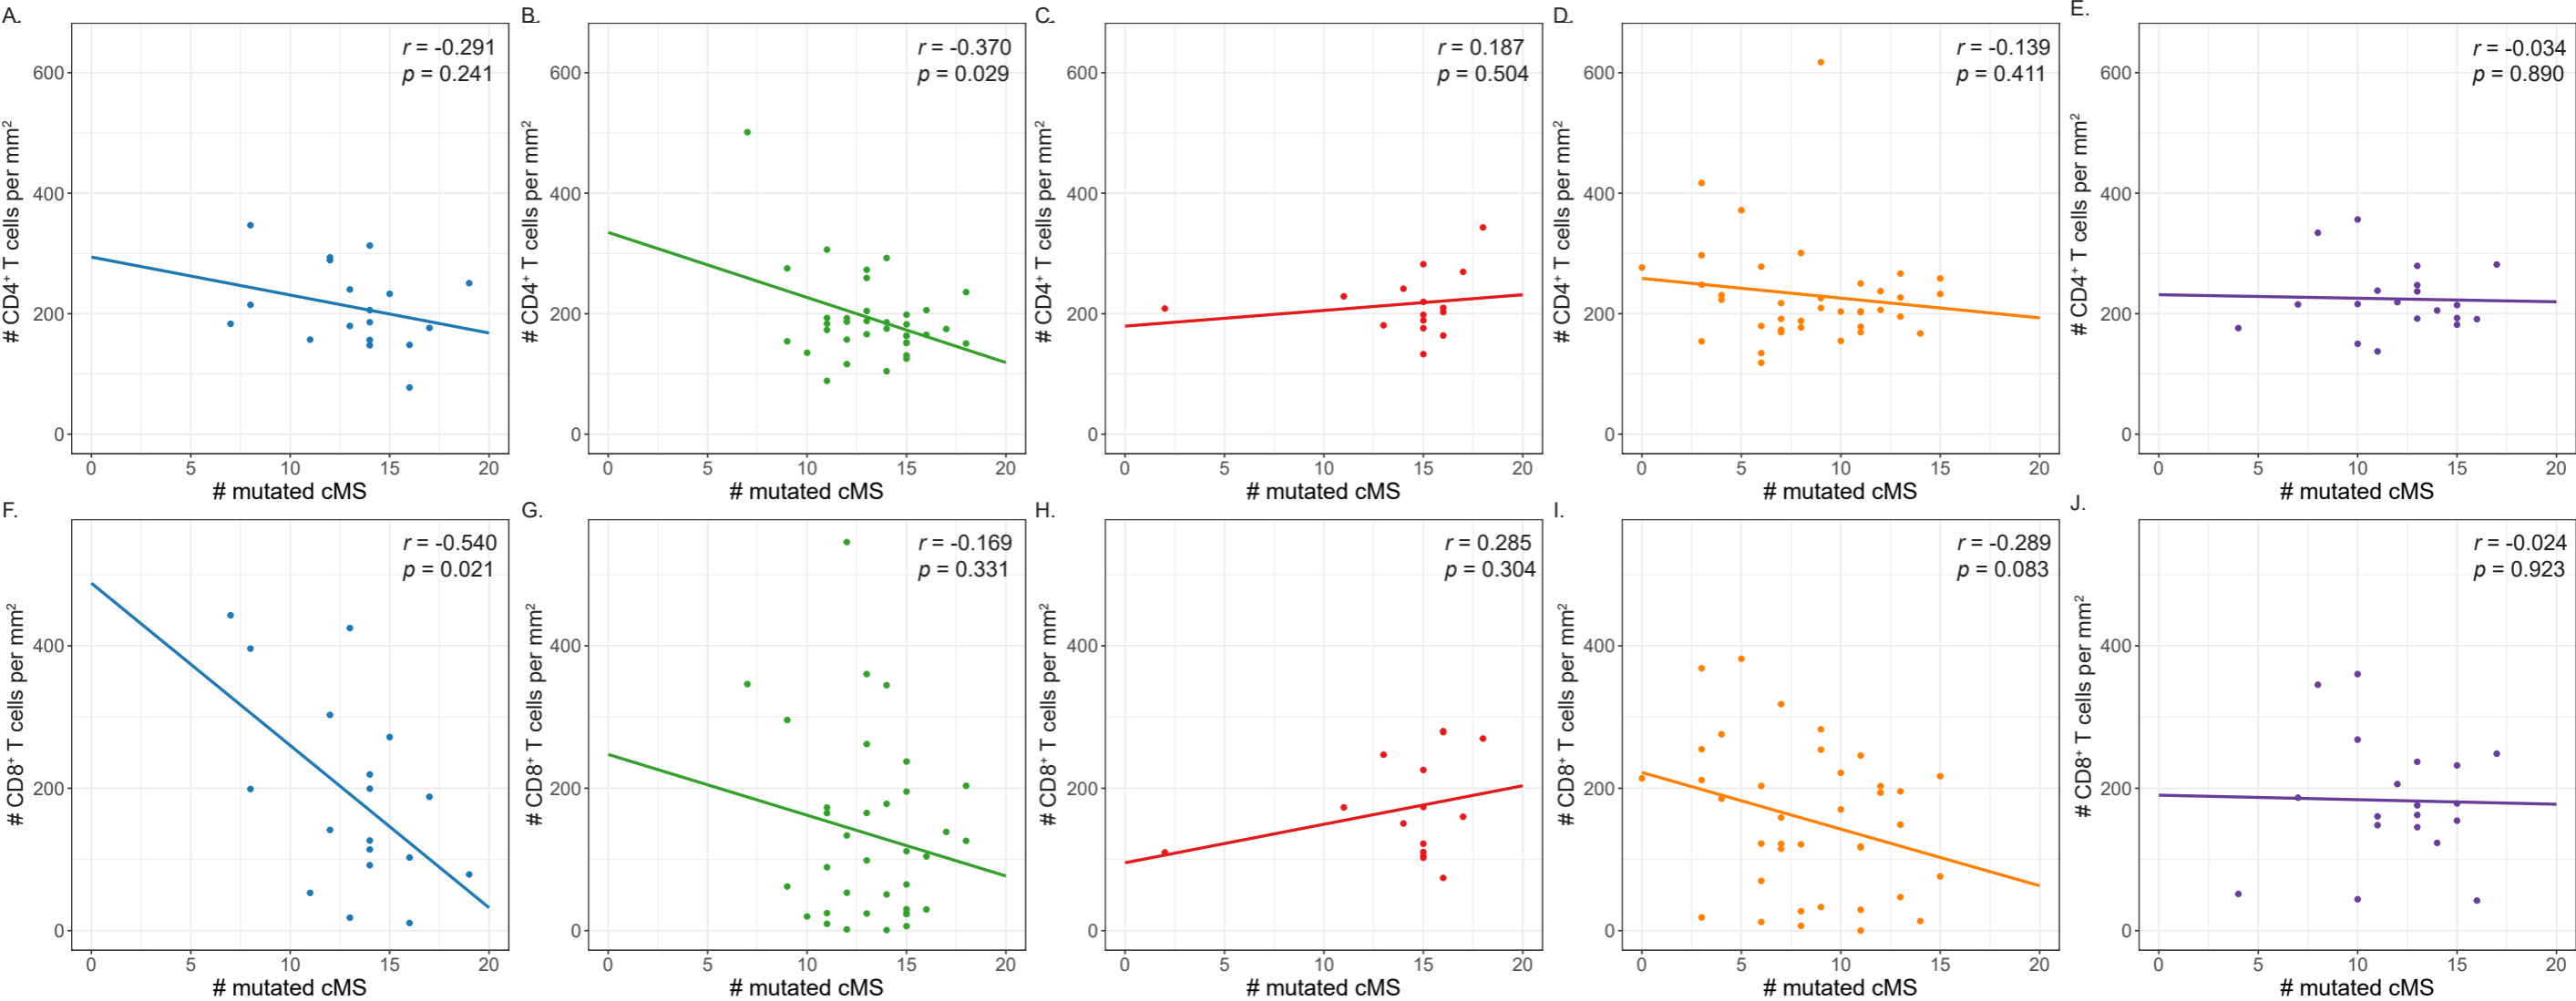

MMR group — MLH1 — MLH1-PM — MSH2 — MSH6 — PMS2
